## RESEARCH ARTICLE

# The neuropeptide Drosulfakinin regulates social isolation-induced aggression in *Drosophila*

Pavan Agrawal<sup>\*,‡</sup>, Damian Kao, Phuong Chung and Loren L. Looger

## ABSTRACT

Social isolation strongly modulates behavior across the animal kingdom. We utilized the fruit fly *Drosophila melanogaster* to study social isolation-driven changes in animal behavior and gene expression in the brain. RNA-seq identified several head-expressed genes strongly responding to social isolation or enrichment. Of particular interest, social isolation downregulated expression of the gene encoding the neuropeptide Drosulfakinin (Dsk), the homologue of vertebrate cholecystokinin (CCK), which is critical for many mammalian social behaviors. *Dsk* knockdown significantly increased social isolation-induced aggression. Genetic activation or silencing of *Dsk* neurons each similarly increased isolation-driven aggression. Our results suggest a U-shaped dependence of social isolation-induced aggressive behavior on *Dsk* signaling, similar to the actions of many neuromodulators in other contexts.

**KEY WORDS:** *Drosophila melanogaster*, Social isolation, Aggression, Neuropeptide, Drosulfakinin, Cholecystokinin

## INTRODUCTION

Social isolation is a passive stressor that profoundly influences the behavior of social animals (Grippio et al., 2007; Hall et al., 1998; Wallace et al., 2009). Social isolation increases aggression in humans (Ferguson et al., 2005), rodents (Luciano and Lore, 1975; Ma et al., 2011; Wallace et al., 2009) and fruit flies (Hoffmann, 1989; Wang et al., 2008).

*Drosophila melanogaster* has been a successful model system for identifying the neural substrates of aggressive behavior (Asahina, 2017; Baier et al., 2002; Chen et al., 2002; Hoopfer, 2016; Kravitz and Huber, 2003). Several conserved neuromodulators have been identified as key players in regulating aggression, including biogenic amines such as dopamine (Alekseyenko et al., 2013; Kayser et al., 2015), octopamine (Certel et al., 2007; Hoyer et al., 2008; Kayser et al., 2015; Williams et al., 2014; Zhou et al., 2008) and serotonin (Alekseyenko et al., 2010, 2014; Dierick and Greenspan, 2007); and neuropeptides including neuropeptide F (NPF; Asahina et al., 2014; Dierick and Greenspan, 2007) and tachykinin (Asahina et al., 2014). The associated receptors (Asahina et al., 2014) and neural circuits have been identified in some cases (Koganezawa et al., 2016).

Flies display aggression in a variety of settings, including male–male competition for females, territorial disputes, etc. (Asahina, 2017; Dow and von Schilcher, 1975; Hoffmann, 1987; Jacobs, 1960; Kravitz and Fernandez, 2015). In the present study, we sought to elucidate the circuit and genetic underpinnings of male aggression induced by deprivation of social interactions. Using an RNA-seq screen, we identified several candidate genes, most notably the gene encoding the neuropeptide Drosulfakinin (*Dsk*) (Chen and Ganetzky, 2012; Chen et al., 2012; Nichols et al., 1988; Söderberg et al., 2012), the homologue of the vertebrate cholecystokinin (CCK). CCK is well documented as a critical modulator of anxiety and aggression in a number of settings (Katsouni et al., 2013; Li et al., 2007; Panksepp et al., 2004; Vasar et al., 1993; Zwanzger et al., 2012). *Dsk* has been reported to modulate aggression in *Drosophila* (Williams et al., 2014), but many mechanistic details are lacking.

Here, we used modulation of group size and isolation duration, RNA-seq, RNA interference (RNAi) and genetic activation or silencing of target neural populations to further elucidate the involvement of *Dsk* in aggressive behavior.

## MATERIALS AND METHODS

### Fly stocks and rearing

Flies were reared on standard food at 25°C and 65% relative humidity with a 12 h:12 h light:dark cycle. For behavioral and molecular experiments, flies were collected within 24–48 h of eclosion and group housed (GH) or single housed (SH) for 4 days, unless mentioned otherwise. The following fly strains were obtained from the Bloomington *Drosophila* Stock Center: *Dsk*-GAL4 (BL51981; Asahina et al., 2014); *Dilp2*-GAL4 (*Dilp2/Ilp2*; BL37516); *elav*-GAL4<sup>elav</sup> (BL458). For *Dsk*- and *Dilp2*-GAL4 expression analysis a fluorescent reporter (Etheredge et al., 2018) carrying *pJFRC105-10XUAS-IVS-NLS-tdTomato* in VK00040 (a gift from Barret D. Pfeiffer, Rubin lab, Janelia Research Campus) and *pJFRC29-10XUAS-IVS-myr::GFP-p10* in attP40 (Pfeiffer et al., 2012) was used. For examining CCKLR-17D1 expression, a MiMIC reporter (Nagarkar-Jaiswal et al., 2015) (BL 61771; y[1] w[\*] Mi{PT-GFSTF.2}CCKLR-17D1[MI03679-GFSTF.2]) was used. For aggression and qPCR assays, comparisons were made between equivalent genetic backgrounds. The stock used for neural silencing *pUAS-Kir2.1-EGFP* and its corresponding control *pJFRC2-10XUAS-IVS-mCD8::GFP* were obtained from the Fly Facility Shared Resource at the Janelia Research Campus. *Dsk*-GAL4, *Dilp2*-GAL4 and *elav*-GAL4<sup>elav</sup> and stocks used for neural activation (*UAS-NaChBac*, BL9466; and control *UAS-mCD8::GFP*, BL5130) were outcrossed for six to seven generations into *w*-; Berlin background. The following Transgenic RNAi Project (TRiP) RNAi lines (Perkins et al., 2015) were obtained from the Bloomington *Drosophila* Stock Center: *Dsk*-RNAi (BL25869), *CCKLR-17D1*-RNAi (BL27494), *CCKLR-17D3*-RNAi (BL28333) and the *attP2* background control without RNAi insert (BL36303). To negate

Janelia Research Campus, Howard Hughes Medical Institute, Ashburn, VA 20147, USA.

<sup>\*</sup>Present address: Centre for Molecular Neurosciences, Kasturba Medical College, Manipal Academy of Higher Education, Udipi 576104, Karnataka, India.

<sup>‡</sup>Author for correspondence (pavan.janelia@gmail.com)

 P.A., 0000-0002-4494-7859; D.K., 0000-0002-2277-6147; L.L.L., 0000-0002-7531-1757

Received 22 May 2019; Accepted 19 December 2019

effects of the mini-white gene on aggression (Hoyer et al., 2008), male progenies were obtained by crossing virgin females of various GAL4 drivers and males of TRiP RNAi for *Dsk*, *CCKLR-17D1* and *CCKLR-17D3* or corresponding background controls.

### Immunohistochemistry and imaging

Fly brains were dissected in cold 1× PBS and fixed in 2% paraformaldehyde (in 1× PBS) at room temperature for 1 h on a Nutator, washed four times for 20 min each in PAT (1× PBS, 0.5% PBS Triton, 1% BSA) at room temperature, blocked for 1 h at room temperature with blocking buffer (PAT+3% normal goat serum) and incubated with primary antibodies, diluted in blocking buffer, overnight on a Nutator at 4°C. The primary antibodies used were: mouse anti-GFP (Sigma-Aldrich, G6539, 1:200 dilution), rabbit anti-DsRed (Clontech, 632496, 1:500 dilution), rat anti-DN-cadherin (Developmental Studies Hybridoma Bank, DNEX#8, 1:50 dilution), mouse anti-Flag (Sigma-Aldrich, F1804, 1:100 dilution) and rat anti-Dilp2 (gift from Dr Eric Rulifson, UCSF, 1:800 dilution). This was followed by four washes for 20 min each in PAT, and incubation overnight on a Nutator at 4°C with secondary antibodies diluted in blocking buffer. The secondary antibodies were all from Molecular Probes and were used at 1:500 dilution: Alexa Fluor 488 anti-mouse (A11029), Alexa Fluor 568 anti-rabbit (A11036), Alexa Fluor 568 anti-rat (A11077) and Alexa Fluor 633 anti-rat (A21094). Brains were then washed four times for 20 min each in PAT at room temperature, and once for 20 min in 1× PBS, and mounted with VECTASHIELD mounting medium (Vector Laboratories, H-1000). Samples were imaged on a Zeiss 800 confocal laser-scanning microscope.

### RNA extraction, library preparation and sequencing

Male Canton-S flies collected within 24–48 h of eclosion were housed either in groups of 20 flies per vial (GH) or individually (SH) for 4 days and flash-frozen during the afternoon and stored at –80°C until RNA extraction. Ten to 15 flies were vortex-decapitated and heads were collected on dry ice. Heads were lysed in Trizol, and total RNA was extracted using a Zymo Direct Zol kit (Zymo Research, R2051), in-tube DNase digestion was performed using a Turbo DNA free kit (Thermo Fisher Scientific, AM1907), and RNA was purified using a Zymo RNA Clean and Concentrator kit (Zymo Research, R1013) as per the manufacturer's instructions. External RNA Controls Consortium (ERCC) spike-ins were added, and RNA was processed for sequencing using Ovation RNA-Seq System V2 (Nugen Technologies, 7102-32) and Ovation Rapid DR Multiplex System 1-8 (Nugen Technologies, 0319-32) as per the manufacturer's instructions. Two biological replicates were performed for each condition. Paired-end 100 bp sequencing reads were obtained using an Illumina Hi-seq 2500 (Illumina, San Diego, CA, USA).

### RNA-seq analysis

All reads were trimmed with Trimmomatic 0.36 at a minimum read length of 50 and an average read quality across a sliding window of 15. Trimmed reads were mapped to *Drosophila* genome version r6.03 with STAR (Dobin et al., 2013) with default settings. Pairwise differential expression analysis was performed with DESeq2, EBseq and edgeR following instructions given in the respective R package's workflow. Genes that were differentially expressed at stricter than an adjusted (corrected for multiple testing using the Benjamini–Hochberg method) *P*-value of 0.05 and a fold-change greater than 2 were used for further analysis. Gene ontology (GO) analysis was performed on enriched genes using GOrilla (<http://cbl-gorilla.cs.technion.ac.il/>). Approximately 5000 genes expressed in fly heads were used as

background for GO analysis and were obtained from FlyBase (<http://www.flybase.org>). The raw data from RNA-seq experiments have been deposited into the Sequence Read Archive (<https://www.ncbi.nlm.nih.gov/sra>) with accession number PRJNA481582. Processed RNA-seq data in Tables S1–S3 are available from the Dryad Digital Repository (<https://doi.org/10.5061/dryad.m1674h1>).

### qPCR validation

RNA was extracted from the heads of flies as described in previous sections. Genotype and age of flies used for qPCR were matched to their corresponding behavioral assay. After RNA extraction, cDNA was prepared using a SuperScript VILO Master Mix kit (Thermo-Fisher Scientific, 11755050). qPCR was performed using Brilliant III Ultra-Fast QPCR Master Mix (Agilent Technologies, 600880) on a StepOne Plus Real-Time PCR System (Thermo Fisher Scientific, 4376600). The following hydrolysis probes (Applied Biosystems, Life Technologies) were used: RPL32 (*Dm02151827\_g1*: 4331182) as an endogenous control, and *Dsk* (*Dm02152147\_s1*: 4351372), *CCKLR-17D1* (*Dm01813942\_g1*: 4448892) and *CCKLR-17D3* (*Dm01813944\_m1*: 4448892) as test probes.

### Aggression assay

The assay was performed essentially as described before (Dankert et al., 2009; Kim et al., 2018). In brief, males of a given genotype were introduced as a pair by gentle aspiration into single wells (16 mm diameter and 10 mm height) of 12-well chambers. Chamber floors were made from 2.25% w/v agarose in commercial apple juice and 2.5% (w/v) sucrose. Walls of the arena were covered with Fluon (BioQuip) to prevent flies from climbing the walls. Flies were allowed to acclimatize to the arena for 5 min, and then fights were recorded for 20 min at 30 frames s<sup>-1</sup>. All fights were performed during the morning activity peak within 2.5 h of lights on, at 25°C and ~40% relative humidity. Lunges were counted by CADABRA (Caltech Automated *Drosophila* Aggression-Courtship Behavioral Repertoire Analysis) software (Dankert et al., 2009).

### Locomotor activity analysis

Flies of various genotypes that were previously SH or GH for 4 days were anesthetized briefly by carbon dioxide and transferred into 5×65 mm transparent plastic tubes with standard corneal dextrose agar media. For recording locomotion levels, *Drosophila* activity monitors (Trikinetics, Waltham, MA, USA) were kept in incubators at 25°C with 65% relative humidity on a 12 h:12 h light:dark cycle. Flies were allowed one night to acclimatize to the activity monitor, and then data were collected in 1-min bins for 24 h (daytime plus night-time activity) as described before (Donelson et al., 2012).

### Statistical analysis

Statistical analysis of behavioral data was performed using Prism 7 (GraphPad Software). Aggression data are usually non-normally distributed and thus appropriate non-parametric tests were chosen. For activity data, parametric tests were chosen. Unless specified, we used ANOVA (non-parametric or parametric, as appropriate), followed by appropriate *post hoc* tests of significance. We used Mann–Whitney *U* (a.k.a. Wilcoxon rank-sum), Kruskal–Wallis and Student's *t*-tests of significance, as appropriate.

## RESULTS

### Social isolation induces transcriptional changes in male *Drosophila* heads

To probe the molecular mechanisms involved in regulating social isolation-induced behaviors, we performed RNA-seq on male flies

that were housed either individually (single-housed, SH) or in groups of 20 (group-housed, GH) for 4 days in vials containing standard fly food. Flies were flash-frozen, whole heads were isolated, and RNA was prepared and sequenced ( $N=2$  biological replicates) (Fig. 1A). Both SH and GH datasets showed strong inter-replicate concordance ( $r=0.964$  and  $0.965$ , respectively; Fig. S1). Commonly used RNA-seq analysis methods utilize diverse models for dispersion, normalization and differentially expressed gene (DEG)

calling. To increase stringency of our DEG calling, we utilized three separate techniques, DESeq2 (Love et al., 2014), edgeR (Robinson et al., 2010) and EBseq (Leng et al., 2013), and compared their results (see Materials and Methods). We focused on genes identified by all three methods, which we considered to be robust hits.

Using stringent criteria for differential expression, i.e. fold-change  $\geq 2$  and false discovery rate  $\leq 0.05$  (Fig. 1B, Table S1), 90 genes were selected by at least one method, and 25 by all three

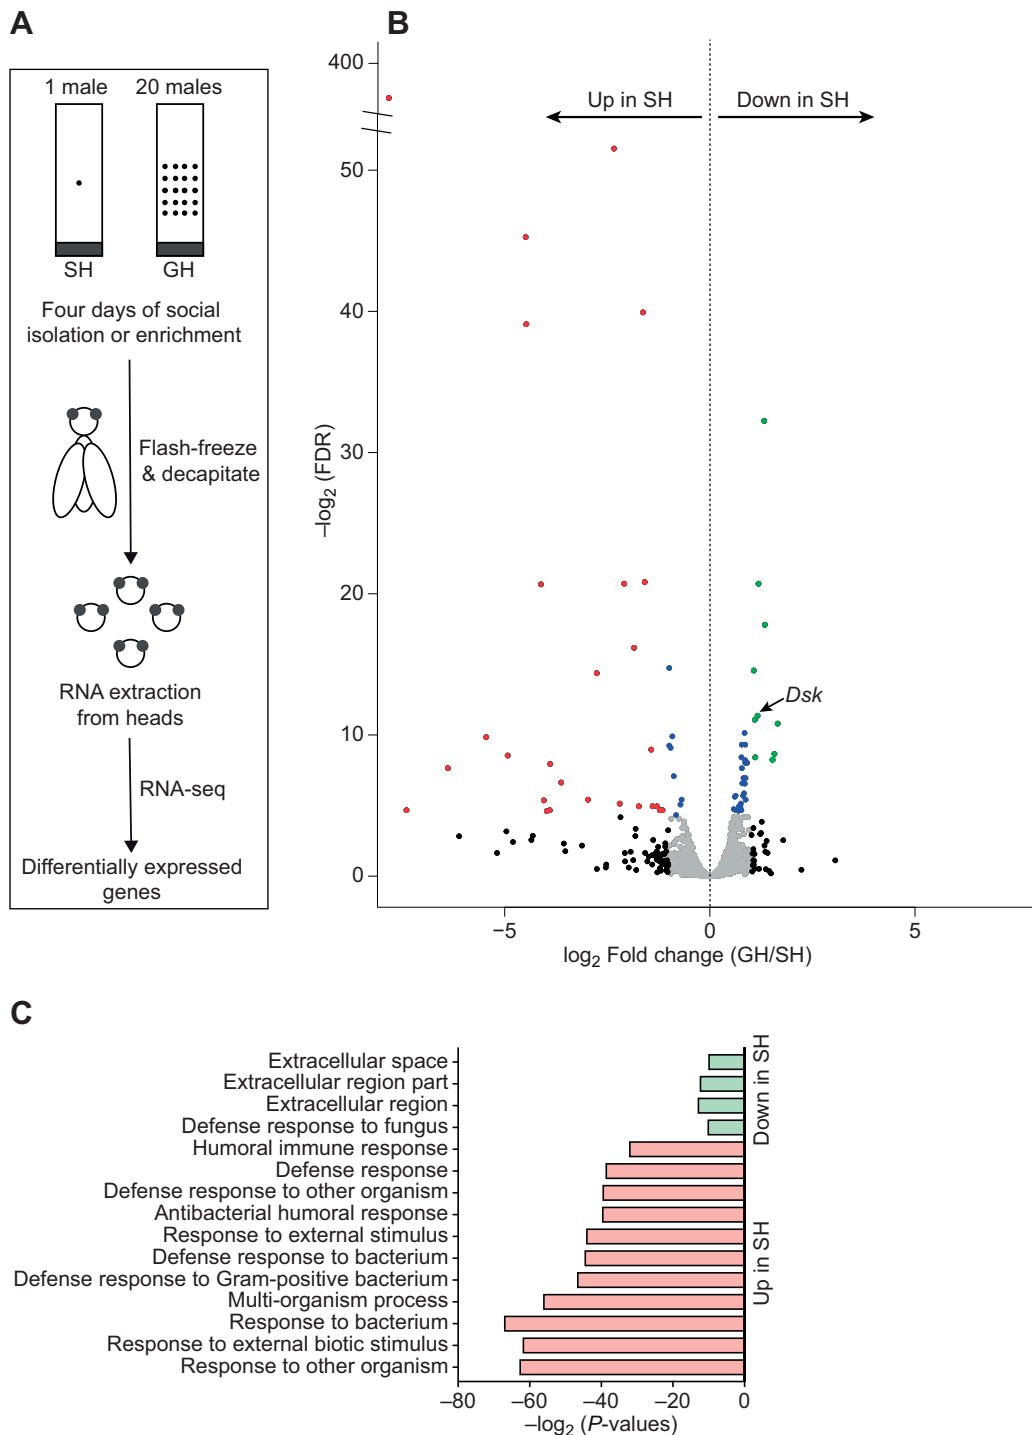

**Fig. 1. Transcriptional differences in male heads after single housing (SH) or group housing (GH).** (A) Outline of the experimental paradigm. (B) Volcano plot of RNA-seq profile using DESeq2 for individual genes. Gray, fold change (FC) $<2$ ; black, FC $>2$ ; blue,  $P<0.05$ ; green,  $P<0.05$  and +FC $>2$ ; red,  $P<0.05$  and  $-FC>2$ . *Dsk*, *Drosulfakinin*; FDR, false discovery rate. (C) Enriched gene ontology categories for differentially expressed genes obtained from DESeq2 analysis.

(Table 1). Most DEGs were related to the immune response (Table 1 Tables S1 and S2), which is consistent with the observation that social isolation leads to immune upregulation across the animal kingdom (Cole et al., 2015; Ellen et al., 2004; Powell et al., 2013). Many of these immune-related genes are commonly seen as DEGs in fly microarray and RNA-seq experiments (Carney, 2007; Ellis and Carney, 2011; Mohorianu et al., 2017; Wang et al., 2008) (Table S3). We compared 90 social isolation-induced DEGs in whole fly heads with similar data generated specifically from FACS-purified dopaminergic neurons (Agrawal et al., 2019a). Depending on the particular method used to identify DEGs, we found between three and nine genes common between these two datasets, suggesting that social isolation regulates somewhat different sets of genes in whole heads relative to dopaminergic neurons (Table S3). Along these lines, perturbation of neural activity stimulates expression of distinct sets of genes in whole brain versus dopaminergic neurons (Chen et al., 2016).

In our data, very few (seven downregulated, four upregulated) not-obviously immune transcripts were identified by all three RNA-seq analysis methods as being significantly modulated by social experience (Table 1, Table S1). Examples of genes downregulated in SH males include the male-specific odorant-binding protein *Obp99b* (Anholt et al., 2003), hydroxysteroid dehydrogenase *CG6012*, and *Drosulfakinin* (*Dsk*) (Fig. 1B, Table 1). Genes upregulated in SH males included the sensory cilium structural protein *Artichoke* (*Atk*), cathepsin-like protease *CG11459*, long non-coding RNA *CR44404* and secreted peptide *CG43175* (Table 1). Several of these transcripts have been identified in previous studies (Table S3), albeit under different conditions (e.g. courtship, social defeat) (Barajas-Azpeleta et al., 2018; Carney, 2007; Ellis and Carney, 2011; Mohorianu et al., 2017; Wang et al., 2008) or by different techniques (e.g. microarray, RNA-seq). Of these stringently selected transcripts, only *Dsk* and *CG9377* (a serine protease of unknown function) are specific to the brain

over other regions (Table S1). Owing to the strong brain expression and neuropeptide activity, *Dsk* was selected for further study. *Dsk* expression differences were validated with qPCR on head-extracted RNA isolated from SH and GH males (Fig. S2A).

### **Dsk knock-down affects social isolation-induced aggression**

As CCK is known to regulate aggression, anxiety and social-defeat responses in rodents (Katsouni et al., 2013; Li et al., 2007; Panksepp et al., 2004; Vasar et al., 1993; Zwanzger et al., 2012), we next tested specific phenotypic effects of *Dsk* modulation. *Dsk* localizes to the pars intercerebralis, parts of the protocerebrum and the sub-oesophageal ganglion (Nichols, 1992; Nichols and Lim, 1996; Söderberg et al., 2012). In the pars intercerebralis, *Dsk* is expressed in the insulin-like peptide *Dilp2*-producing neurons (Söderberg et al., 2012). *GAL4* driver lines are available for both *Dsk* (Asahina et al., 2014) and *Dilp2* (Rulifson, 2002) and recapitulate their known expression patterns (Fig. 2A,B). To quantify aggression, we counted lunges using the software package CADABRA (Dankert et al., 2009). Lunging, i.e. a fly rearing on its hind legs and snapping downward on its opponent, is a prominent aggressive behavior in *Drosophila* males (Hoffmann, 1987; Hoyer et al., 2008; Nilsen et al., 2004). Knockdown of *Dsk* in *Dsk-GAL4* neurons using RNAi significantly increased lunges in SH flies relative to controls without RNAi insert (Fig. 2C). Similar effects were observed upon *Dsk* knock-down using the *Dilp2-GAL4* driver (Fig. 2E). Successful knockdown using pan-neuronal *elav-GAL4<sup>c155</sup>* was confirmed by qRT-PCR (Fig. S2B). Thus, lowering *Dsk* expression in the pars intercerebralis increased aggressive lunging following social isolation.

It was previously suggested that aggressive behaviors should be normalized to overall locomotor activity (Hoyer et al., 2008). Isolated wild-type flies sleep less and show greater levels of overall daytime activity (Ganguly-Fitzgerald et al., 2006) than GH flies. In contrast, isolated *Dsk*-knockdown flies show significantly reduced

**Table 1. Genes identified as differentially expressed upon social isolation by three different RNA-seq analysis methods**

| Flybase gene ID | Gene symbol     | DESeq2/edgeR/EBseq | Annotation/known/predicted function         |
|-----------------|-----------------|--------------------|---------------------------------------------|
| FBgn0039685     | <i>Obp99b</i>   | Downregulated      | Sensory perception of chemical stimulus     |
| FBgn0000500     | <i>Dsk</i>      | Downregulated      | Neuropeptide                                |
| FBgn0032615     | <i>CG6012</i>   | Downregulated      | Hydroxysteroid dehydrogenase                |
| FBgn0036589     | <i>CG13067</i>  | Downregulated      | Cuticle protein                             |
| FBgn0030398     | <i>Cpr11B</i>   | Downregulated      | Cuticle protein                             |
| FBgn0032507     | <i>CG9377</i>   | Downregulated      | Epithelial protease                         |
| FBgn0040629     | <i>CG18673</i>  | Downregulated      | Carbonic anhydrase 2                        |
| FBgn0052282     | <i>Drsl4</i>    | Downregulated      | Antifungal peptide                          |
| FBgn0035434     | <i>Drsl5</i>    | Downregulated      | Antifungal peptide                          |
| FBgn0000278     | <i>CecB</i>     | Upregulated        | Antibacterial humoral response              |
| FBgn0005660     | <i>Ets21C</i>   | Upregulated        | Defense response to bacterium               |
| FBgn0032638     | <i>SPH93</i>    | Upregulated        | Defense response to Gram-positive bacterium |
| FBgn0032639     | <i>CG18563</i>  | Upregulated        | Epithelial protease                         |
| FBgn0265577     | <i>CR44404</i>  | Upregulated        | Long non-coding RNA                         |
| FBgn0014865     | <i>Mtk</i>      | Upregulated        | Antifungal peptide                          |
| FBgn0036995     | <i>Atk</i>      | Upregulated        | Sensory cilium structural protein           |
| FBgn0038299     | <i>Spn88Eb</i>  | Upregulated        | Fungal-induced protease inhibitor           |
| FBgn0052185     | <i>Edin</i>     | Upregulated        | Defense response to Gram-negative bacteria  |
| FBgn0037396     | <i>CG11459</i>  | Upregulated        | Cathepsin-like protease                     |
| FBgn0010381     | <i>Drs</i>      | Upregulated        | Antifungal peptide                          |
| FBgn0043578     | <i>PGRP-SB1</i> | Upregulated        | Innate immune response                      |
| FBgn0010388     | <i>Dro</i>      | Upregulated        | Antibacterial peptide                       |
| FBgn0039593     | <i>Sid</i>      | Upregulated        | Response to bacterium                       |
| FBgn0262794     | <i>CG43175</i>  | Upregulated        | Unannotated secreted peptide                |
| FBgn0044812     | <i>TotC</i>     | Upregulated        | Response to bacterium                       |

The last column shows gene function from Flybase, or predicted from Pfam (<http://pfam.xfam.org>) classification or annotation of homologues in other species if not annotated in Flybase. A complete list of genes and gene ontology analysis is included in Tables S1 and S2.



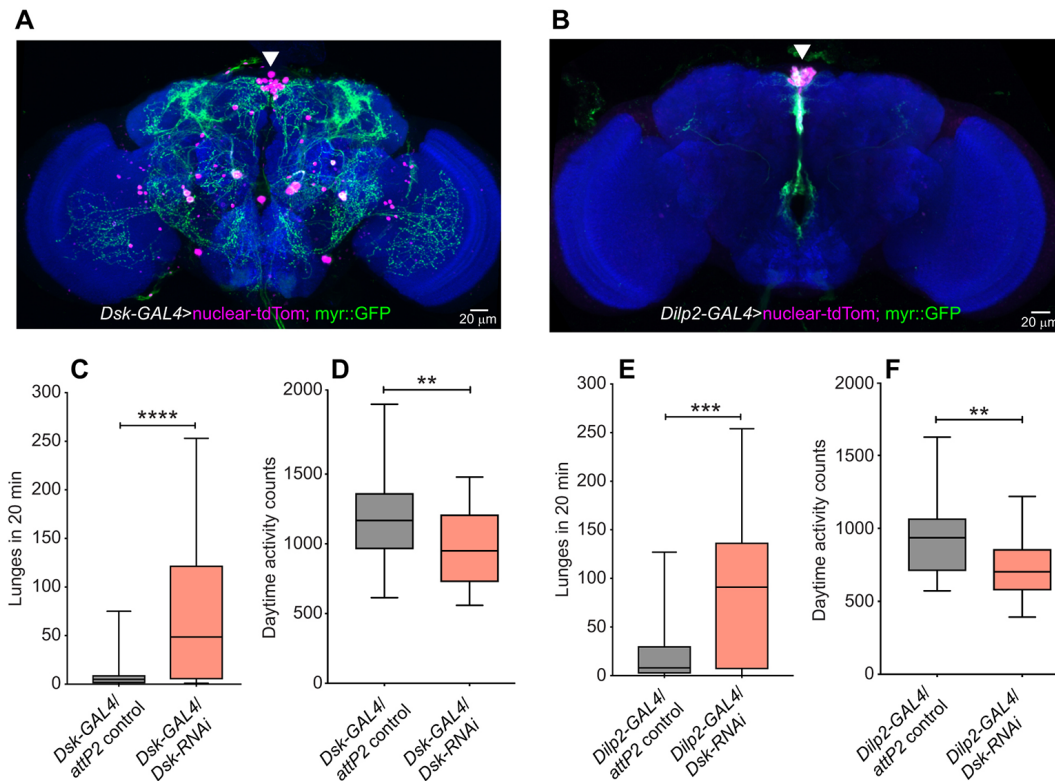

**Fig. 2. *Dsk* knockdown increases social isolation-induced aggression independently of overall activity levels.** *Dsk* levels were reduced by driving the expression of *UAS-Dsk-RNAi* with *Dsk-GAL4* or *Dilp2-GAL4*. (A,B) These drivers overlap in the pars intercerebralis region (white arrowheads). RNAi-mediated *Dsk* knockdown increased aggression in SH flies relative to the *attP2* background controls without RNAi insert (C: *Dsk-GAL4*,  $P < 0.0001$ ,  $N = 38$ ; E: *Dilp2-GAL4*,  $P = 0.0004$ ,  $N = 26$ ; Mann–Whitney *U*-test). *Dsk* knockdown significantly reduced the overall daytime activity of SH males (D: *Dsk-GAL4*,  $P = 0.004$ ,  $N = 32$ ; F: *Dilp2-GAL4*,  $P = 0.002$ ,  $N = 32$ ; Student's *t*-test).

overall daytime activity (Fig. 2D,F for *Dsk-GAL4* and *Dilp2-GAL4*, respectively), with no effect in GH flies (Fig. S3). Thus, the observed increase in aggression in SH males upon *Dsk* knockdown arises despite decreased overall activity.

In *Drosophila*, *Dsk* has two receptors, CCK-like receptor (CCKLR)-17D1 and CCKLR-17D3 (Kubiak et al., 2002). Signaling through CCKLR-17D1, but not CCKLR-17D3, is responsible for larval neuromuscular junction growth and muscle contraction (Chen and Ganetzky, 2012; Chen et al., 2012). Because *GAL4* driver reagents are not available for several neuropeptide receptors, we used a MiMIC reporter line (Nagarkar-Jaiswal et al., 2015) available for *CCKLR-17D1* (see Materials and Methods) to ascertain its expression in the brain. We found reporter expression in several brain regions including in the pars intercerebralis (PI), which overlapped with *Dilp2* expression (Fig. S4A–C, A'–C'). Successful knockdown for both *CCKLR-17D1* and *CCKLR-17D3* was confirmed using *elav-GAL4<sup>el55</sup>* by qRT-PCR (Fig. S4D). However, in *Dsk-GAL4* or *Dilp2-GAL4* flies, knockdown of *CCKLR-17D1*, but not *CCKLR-17D3*, increased aggression of SH flies (Fig. S4E,F). This is consistent with results for the ligand *Dsk* and suggests that signaling of *Dsk* through its receptor CCKLR-17D1 in the PI increases isolation-driven aggression.

#### Social isolation is essential for *Dsk*-mediated aggression

To more precisely determine the interaction between social isolation and *Dsk*, we varied group size and isolation length from 1 to 20 flies and from 1 to 4 days, respectively. The presence of even a single other fly almost eliminated *Dsk* knockdown-evoked aggression,

and aggression remained suppressed as group size increased (Fig. 3A,B). As few as 1–2 days of isolation modestly but significantly increased aggression in SH males in which *Dsk* was knocked down (Fig. S5A,B); the effect on aggression increased with longer isolation for up to 4 days.

#### Both activation and silencing of *Dsk* neurons increase aggression

Having established the contribution of *Dsk* and its receptor *CCKLR-17D1* to aggression in SH males, we next explored the function of the neurosecretory cells themselves. Silencing of *Dsk* neurons with the inward rectifying potassium channel Kir2.1 (Baines et al., 2001) significantly increased lunging (Fig. 4A), which is consistent with the involvement of *Dsk* and CCKLR-17D1 signaling for promoting aggression in SH males. Surprisingly, genetic activation of *Dsk* neurons with the bacterial sodium channel NaChBac (Nitabach, 2006) also increased aggression (Fig. 4B). GH flies showed very few lunges in all cases, indicating that social isolation is critical for aggression in our assays (Fig. 4A,B).

#### DISCUSSION

We have shown that knockdown of the neuropeptide *Dsk* or its receptor *CCKLR-17D1* in the pars intercerebralis (PI) increases social isolation-driven aggression of male flies. Moreover, *Dsk* appears to act in a U-shaped fashion (Fig. 4C), with both knockdown (our results) and overexpression (Williams et al., 2014) increasing aggression. We also showed that *Dsk* neuronal activity follows a similar trend, with both activation and silencing increasing aggression. Williams et al. (2014) overexpressed the *Dsk*

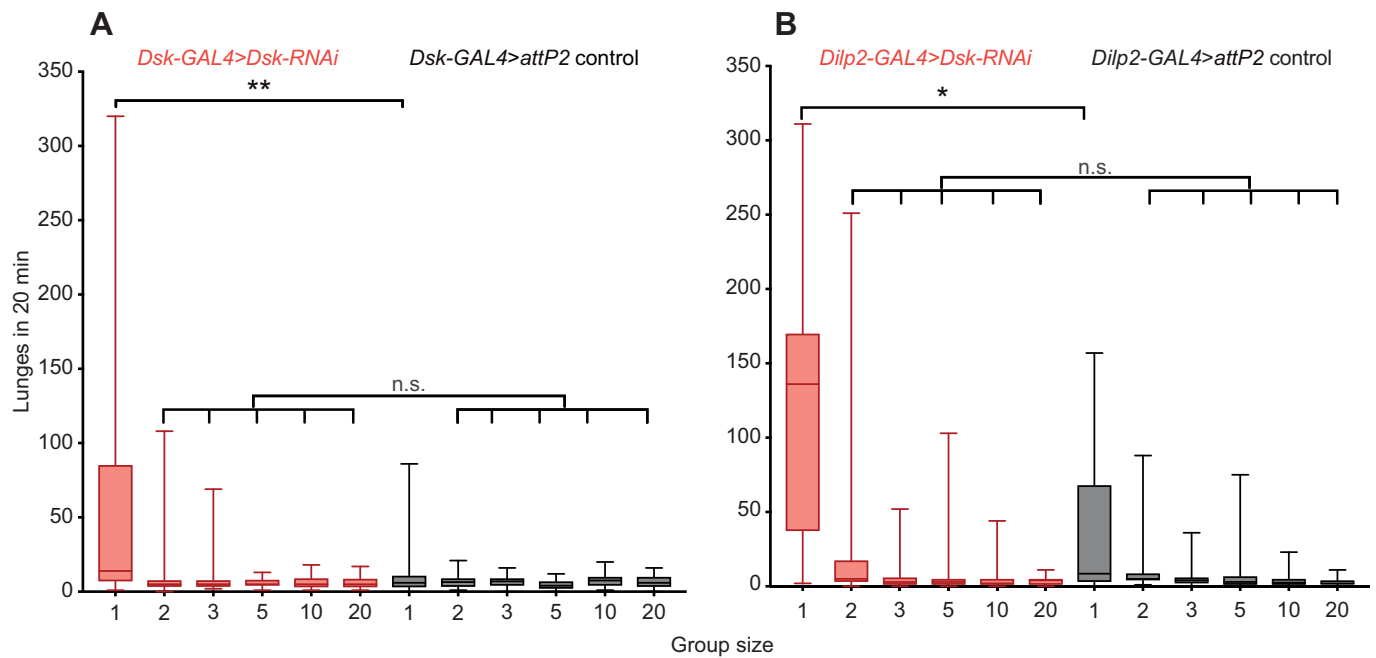

**Fig. 3. Social isolation is essential for aggression mediated by *Dsk* knockdown.** (A) *Dsk-GAL4/Dsk-RNAi* versus *Dsk-GAL4/attP2*-control. Group size 1, **\*\*** $P=0.0037$ . *Dsk-GAL4/Dsk-RNAi*,  $N=36$  (Group size 1, 2, 3, 5, 10, 20). *Dsk-GAL4/attP2*-control,  $N=34$  (Group size 1);  $N=36$  (Group size 2, 10, 20);  $N=35$  (Group size 3);  $N=33$  (Group size 5). (B) *Dilp2-GAL4/Dsk-RNAi* vs *Dilp2-GAL4/attP2*-control, group size 1, **\***,  $P=0.013$ . *Dilp2-GAL4/Dsk-RNAi*,  $N=36$  (Group size 1, 2, 5, 10);  $N=34$  (Group size 3);  $N=20$  (Group size 20). *Dilp2-GAL4/attP2*-control,  $N=36$  (Group size 1, 2, 3, 10);  $N=24$  (Group size 5);  $N=32$  (Group size 20). Presence of other males drastically reduced aggression, as seen in group size 2 or greater. Kruskal–Wallis ANOVA with Dunn’s multiple comparison test.

transcript in the PI region, which resulted in increased aggression; furthermore, activation of PI neurons was also shown to increase aggression in a separate study (Davis et al., 2014). Taken together, this suggests that the primary role of these neurons in this context is indeed production and secretion of *Dsk* (Söderberg et al., 2012). Transcription factors in the fly PI neurons regulating aggression were recently identified (Davis et al., 2014), and it was shown that activation of PI neurons increases aggression. However, the

downstream neuropeptides were not known (Thomas et al., 2015). Our findings identify *Dsk* as a key neuropeptide expressed in the PI region that regulates aggression. Further work will be required to delineate the aggression-modulating functions, if any, of other neuropeptides also secreted from the PI region.

A recent neural activation screen (Asahina et al., 2014) explored the role of neuropeptides in aggression in *Drosophila*, but investigated only group-housed flies. Intriguingly, Asahina et al.

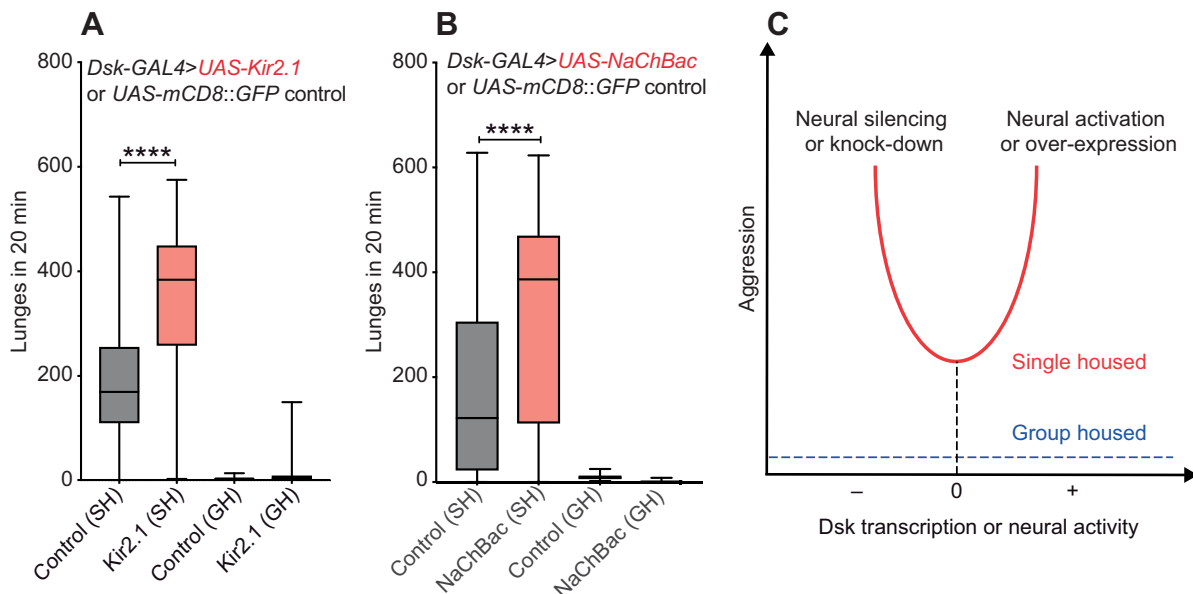

**Fig. 4. Genetic activation and silencing of *Dsk* neurons both increase aggression.** (A) Silencing of *Dsk* neurons with *UAS-Kir2.1-EGFP* by *Dsk-GAL4* driver increases aggression in SH males (**\*\*\*\*** $P<0.0001$ ,  $N=48$ , Mann–Whitney  $U$ -test). (B) Activation of *Dsk* neurons with *UAS-NaChBac* by *Dsk-GAL4* driver also increases aggression in SH males (**\*\*\*\*** $P<0.0001$ ,  $N=52$ , Mann–Whitney  $U$ -test). Controls in both A and B are *UAS-mCD8::GFP* transgene driven by *Dsk-GAL4*. (C) Schematic of putative U-shaped effect of *Dsk* neuron activity and transcript levels on aggression.

(2014) identified tachykinin signaling in the lateral protocerebrum and did not find increased aggression in GH flies upon activation of *Dsk* neurons. Thus, male–male aggression in GH and SH flies appears to be controlled by different neuropeptides in different brain regions. The absence of *Dsk* neurons from the screen results in GH flies (Asahina et al., 2014), combined with our results showing suppressed aggression in GH flies regardless of *Dsk* transcription or neural activity, suggests a mechanism that overrides *Dsk* function.

Downregulation of the *Dsk* receptor *CCKLR-17D1* in *Dsk/Dilp2* neurons also increased aggression, consistent with the observation that some neuropeptidergic neurons, e.g. those for neuropeptide F (Shao et al., 2017; Wen et al., 2005), neuropeptide Y (Qi et al., 2016) and FMRFamide (Ravi et al., 2018), have receptors to modulate their signaling in an autocrine manner. However, pan-neuronal downregulation of *CCKLR-17D1* receptor did not affect aggression (data not shown), suggesting potential antagonistic effects outside *Dsk/Dilp2* neurons.

To address potential developmental effects of *Dsk* signaling, it would be useful to temporally restrict neural perturbation. However, our efforts to conditionally silence *Dsk*<sup>+</sup> neurons only in the adult using temperature-sensitive *UAS-Kir2.1-GAL80<sup>ts</sup>* were inconclusive, because prolonged exposure of flies (including controls) to the permissive temperature (30°C) affected their basal locomotion and aggression (data not shown). To address potential off-target targets of the *TRiP Dsk* RNAi line, we tested another RNAi line against *Dsk* (VDRC 14201) but did not observe significant reduction in *Dsk* levels (data not shown). It would be useful to test other *Dsk* loss-of-function alleles (Wu et al., 2019) in future. However, our conclusions about the involvement of *Dsk* in isolation-mediated aggression are supported by the similar effects from knockdown of its receptor *CCKLR-17D1*, as well as silencing and activation of *Dsk*-secreting neurons.

### Homeostatic regulation of behaviors

The U-shaped ('homeostatic') response of the aggression phenotype to both *Dsk* levels and *Dsk*<sup>+</sup> neuronal activity is similar to such responses seen for NPF (Asahina et al., 2014; Dierick and Greenspan, 2007) and dopamine (Alekseyenko et al., 2013) neurons in *Drosophila* aggression. Such effects are not unexpected, given the ubiquity of such homeostatic responses in neuromodulator signaling pathways (Baldi and Bucherelli, 2005; Flood et al., 1987; Monte-Silva et al., 2009) and receptors in general (Calabrese and Baldwin, 2001). At the level of individual G-protein coupled receptors, such U-shaped responses (low-dose agonism, high-dose antagonism) arise directly from equations considering receptor expression level and the effects of receptor activation on downstream signaling pathways (Kohn and Melnick, 2002). At the circuit level, it is thought that such U-shaped responses help to maintain neuronal activity patterns, and the resulting behaviors, near homeostatic optima, with deviations resulting in negative feedback (Arnsten et al., 2012; Brunel and Wang, 2001; Herman, 2013).

### Social experience modulates gene expression in *Drosophila* heads

There have been a number of prior studies on the genetic basis of aggression in *Drosophila*, many of them performed with DNA microarrays – which record counts for specific transcripts of interest – rather than with RNA-seq, which counts all transcripts within cells. Four such studies have been performed in recent years, each identifying a large number of putative aggression-related genes: Edwards et al. (2006) found 1672 such transcripts, Dierick and

Greenspan (2006) found 149, Wang et al. (2008) found 183 and Tauber (2010) found 339. It should be noted that these four studies used very different experimental methods: Edwards et al. (2006) and Dierick and Greenspan (2006) bred flies for aggressive behavior over several generations, and isolated mRNA for microarray analysis at a time unrelated to aggression events; thus, these genes are generally high in the selected flies. Wang et al. (2008) analyzed single-housed and group-housed flies, again irrespective of specific aggression events. Tauber (2010), meanwhile, isolated pairs of aggressive flies and obtained mRNA for sequencing directly following bouts, looking for aggression bout-driven gene expression. Given the substantial differences in experimental design, and the imperfect reliability of microarray quantification, it is perhaps unsurprising that of the 1672, 149, 183 and 339 differentially expressed genes in each study, there were only two in common to all four studies: the gene encoding the olfactory binding protein *Obp99b*, and *CG13794*, an unannotated transporter. *Obp99b* appeared amongst our 25 most significant hits, whereas *CG13794* did not appear to be differentially expressed at all in our assays. Given that the involvement of *Dsk* in aggression is quite context-specific – for instance, Asahina et al. (2014) explicitly ruled out involvement of *Dsk* in aggression of group-housed flies – it is perhaps unsurprising that it was not found in several of the screens. In fact, the only one of these four studies to uncover *Dsk* was the one that utilized socially isolated flies (Wang et al., 2008), strengthening the notion that *Dsk* specifically links social isolation to aggression. It was this link with social behavior that drew our attention to *Dsk*, and indeed our experiments bear out that this function is mediated through activity in the brain. The PI region has been shown to be the seat of regulation of many other social and sexually dimorphic behaviors (Belgacem and Martin, 2002; Luo et al., 2014; Mattaliano et al., 2007; Terhzaz et al., 2007).

At the other end of the spectrum, olfactory inputs are ubiquitous and odor processing through olfactory receptors factors into essentially every fly action. Along with *Dsk*, *Obp99b* was the most downregulated gene in our single-housed males (Table 1, Table S1). *Obp99b* was also picked up in two studies of other social behaviors: courtship-exposed males (Carney, 2007) and male competition for mates (Mohorianu et al., 2017). Olfactory binding proteins (OBPs) are secreted by support cells in the antennal trichoid sensilla to assist in odorant binding and recognition by olfactory receptors (Galindo and Smith, 2001; Larter et al., 2016). A critical role for *Obp76a* (Lush) in recognition of the pheromone cis-vaccenyl acetate (cVA) by olfactory receptor Or67d, and in driving aggression following acute pheromone exposure, has been established (Billeter and Levine, 2015; Wang and Anderson, 2010). However, following chronic cVA exposure, the pheromone also activates a second receptor, Or65a, which then inhibits Or67d glomeruli and decreases aggression (Liu et al., 2011). The OBP mediating cVA recognition by Or65a is currently unknown, but appears not to be Lush (Laughlin et al., 2008). It is possible that the OBP identified in all the screens discussed, i.e. *Obp99b*, recognizes cVA for signaling through Or65a; it is also possible that it recognizes other odorants. Given its ubiquity in screens for social behaviors, we speculate that the molecules recognized are likely pheromones. *Obp99b* is one of the most male-specific transcripts identified (Fujii and Amrein, 2002), and indeed it had been previously discovered as a gene in the sex-determination cascade, under its previous name Turn on Sex-Specificity (*Tsx*) (Wolfner, 2003). In this set of experiments, we selected *Dsk* for investigation because of its link to social context; however, the precise function of *Obp99b* warrants closer study, given its probable role in pheromone detection.



Other prominent hits from our screen appear interesting, as well (Table 1, Table S1). The third most isolation-driven downregulated transcript, *CG6012*, appears to encode a hydroxysteroid dehydrogenase. Such enzymes have been shown to be critical for pheromone production in insects, with the related enzyme *CG1444* (*Spidey*) processing both ecdysone and related cuticular hydrocarbons (Chiang et al., 2016). The *Turandot* peptides, annotated as stress-response genes, also appear to play sex-specific roles in behaviors such as courtship. *Turandot A* and *Turandot C*, both upregulated in isolated males in our study (Table S1), are greatly female-enriched, and *Turandot C*, in particular, is upregulated in female flies following playing of an attractive, conspecific courtship song over a speaker (Immonen and Ritchie, 2012). Finally, we would note that new roles have recently been proposed for transcripts annotated as encoding antimicrobial peptides (e.g. *Diptericin B*, *DptB*), specifically the modulation of long-term memory (Barajas-Azpeleta et al., 2018). It is possible that some of the transcripts annotated as antimicrobial peptides are instead (or in addition) memory regulators with roles in social behaviors. Indeed, playing synthetic attractive, conspecific versus aversive, heterospecific courtship song dramatically lowered expression of the ostensibly antimicrobial peptides *Attacin-A*, *Attacin-C*, *DptB*, *Drosocin* and *Immune-induced molecule 18* (Immonen and Ritchie, 2012). Intriguingly, all of these molecules were increased in males following aversive social isolation in our study (Fig. 1B,C, Table S1). The only other molecule shared between the two studies, *Methuselah-like 8*, showed the opposite pattern: upregulated in females hearing attractive song and downregulated in males after aversive isolation. Of course, given the wealth of bacteria, fungi, viruses and other microbes present in and on flies and their food, it is probable that many annotated antimicrobial peptides are indeed responding to differences in pathogen load composition between SH and GH flies. But the observation that many putatively antimicrobial molecules respond strongly to stimuli (e.g. synthetic courtship song) that do not involve alteration of their physical environment in any way indicates that these molecules have more sophisticated functions in the brain, and may encode valence (attractive, aversive) of social interactions.

Because the *Drosophila* head is composed of highly heterogeneous tissue consisting of neurons, glia, fat bodies, cuticle, etc., we used FlyAtlas anatomical expression data to identify genes specifically expressed in adult brain over adult fat bodies. Interestingly, only *Dsk* and *CG9377* were found to be strongly enriched in the adult brain over fat bodies (Table S1). In the future, it would be useful to utilize recently developed methods that allow access to rare cell types from the brain, such as mini-INTACT (Agrawal et al., 2019a), to identify gene expression differences owing to various stressors including social isolation.

### **Dsk and its homologue CCK have evolutionarily conserved roles in regulating aggression**

In mammals, the *Dsk* homologue cholecystokinin (CCK) and its receptors regulate aggression, anxiety and social-defeat responses (Katsouni et al., 2013; Li et al., 2007; Panksepp et al., 2004; Vasar et al., 1993; Zwanzger et al., 2012). For instance, intravenous injection of the smallest isoform, CCK-4, in humans reliably induces panic attacks (Bradwejn et al., 1991; Tōru et al., 2010) and is often used to screen anxiolytic drug candidates. However, in other contexts, such as in mating (Bloch et al., 1987) and juvenile play (Burgdorf et al., 2006), CCK encodes strong positive valence. CCK colocalizes with dopamine in the ventral striatum, and microinjection

of CCK into the rat nucleus accumbens phenocopies the effects of dopamine agonists, increasing attention and reward-related behaviors (Vaccarino, 1994), further supporting its role in positive valence encoding. CCK actions differ across brain regions, in a context-dependent manner. For instance, time pinned (negative valence) during rough-and-tumble play correlated with increased CCK levels in the posterior cortex and decreased levels in hypothalamus (Burgdorf et al., 2006). However, lower hypothalamic CCK also correlated with positive-valence play aspects including dorsal contacts and 50 kHz ultrasonic vocalizations. Thus, CCK can encode both positive- and negative-valence aspects of complex behaviors differentially across the brain. As with many neuromodulators (Calabrese, 2001; Cools and D'Esposito, 2011; Joëls, 2006), CCK appears to act in a U-shaped fashion, with increases and decreases of signaling from baseline levels often producing similar phenotypes (Burgdorf et al., 2006; Calabrese and Baldwin, 2003; Ding and Bayer, 1993; Köks et al., 1999; Kulkosky et al., 1976).

Taken together, our results suggest an evolutionarily conserved role for neuropeptide signaling through the *Drosulfakinin* pathway (homologue of cholecystokinin) in promoting aggression. Intriguingly, this pathway only seems active in socially isolated flies; in socially enriched flies, aggression is controlled by tachykinin (a.k.a. Substance P) signaling. The PI region, in which the *Dsk/Dilp2* neurons reside, has considerable similarities with the hypothalamus (Hartenstein, 2006), a brain region crucial for regulating aggression in mammals (Gregg and Siegel, 2001; Haller, 2013; Kruk et al., 1984; Lin et al., 2011; Lipp and Hunsperger, 1978; Toth et al., 2010), with the most relevant activity localized to the ventrolateral subdivision of the ventromedial hypothalamus (Lin et al., 2011), where CCK neurons reside (Fulwiler and Saper, 1985). Thus, the predominant aggression-regulating mechanism in rodents bears strong homology to the fly pathway regulating aggression of socially deprived, but not socially enriched, individuals.

### **Acknowledgements**

We thank Ulrike Heberlein for her support throughout this work, helpful discussions and critical reading of the manuscript. We thank Serge Picard, Andy Lemire and Janelia Quantitative Genomics for sequencing, Clement Kent and Anton Schulmann for helpful discussions related to RNA-seq analysis. We thank Karen Hibbard and the Fly Facility Shared Resource at Janelia for help with fly genetics, and Herman Dierck (Baylor College of Medicine, USA), Barret Pfeiffer, Gerald Rubin and Jack Etheredge (Janelia) for fly stocks. We also thank Lisha Shao, Mark Eddison, Jasper Simon (Janelia) and Aurnab Ghose (IISER, Pune) for helpful discussions, and Dr Eric Rulifson (UCSF) for the gift of the anti-Dilp2 antibody.

### **Competing interests**

The authors declare no competing or financial interests.

### **Author contributions**

Conceptualization: P.A.; Methodology: P.A.; Software: D.K.; Validation: P.A.; Formal analysis: P.A., D.K., L.L.L.; Investigation: P.A., P.C.; Resources: P.A.; Data curation: P.A.; Writing - original draft: P.A., L.L.L.; Writing - review & editing: P.A., L.L.L.; Visualization: P.A.; Supervision: P.A.; Project administration: P.A.; Funding acquisition: P.A.

### **Funding**

This work was supported by funding from the Howard Hughes Medical Institute. P.A. is a Ramalingaswamy fellow (BT/HRD/35/02/2006) of the Department of Biotechnology, Ministry of Science and Technology, India. Deposited in PMC for release after 12 months.

### **Data availability**

The raw sequence data from RNA-seq experiments have been deposited into the Sequence Read Archive (<https://www.ncbi.nlm.nih.gov/sra>) with accession number PRJNA481582. Processed RNA-seq data (Tables S1–S3) have been deposited in the Dryad Digital Repository (Agrawal et al., 2019b): <https://doi.org/10.5061/dryad.m1674h1>.



## Supplementary information

Supplementary information available online at  
<http://jeb.biologists.org/lookup/doi/10.1242/jeb.207407.supplemental>

## References

- Agrawal, P., Chung, P., Heberlein, U. and Kent, C. F.** (2019a). Enabling cell-type-specific behavioral epigenetics in *Drosophila*: a modified high-yield INTACT method reveals the impact of social environment on the epigenetic landscape in dopaminergic neurons. *BMC Biol.* **17**, 30. doi:10.1186/s12915-019-0646-4
- Agrawal, P., Kao, D., Chung, P., Looger, L. L.** (2019b). Data from: The neuropeptide Drosulfakinin regulates social isolation-induced aggression in *Drosophila*, v4. *Dryad Dataset*. <https://doi.org/10.5061/dryad.m1674h1>
- Alekseyenko, O. V., Lee, C. and Kravitz, E. A.** (2010). Targeted manipulation of serotonergic neurotransmission affects the escalation of aggression in adult male *Drosophila melanogaster*. *PLoS ONE* **5**, e10806. doi:10.1371/journal.pone.0010806
- Alekseyenko, O. V., Chan, Y.-B., Li, R. and Kravitz, E. A.** (2013). Single dopaminergic neurons that modulate aggression in *Drosophila*. *Proc. Natl. Acad. Sci. USA* **110**, 6151-6156. doi:10.1073/pnas.1303446110
- Alekseyenko, O. V., Chan, Y.-B., Fernandez, M. P., Bülow, T., Pankratz, M. J. and Kravitz, E. A.** (2014). Single serotonergic neurons that modulate aggression in *Drosophila*. *Curr. Biol.* **24**, 2700-2707. doi:10.1016/j.cub.2014.09.051
- Anholt, R. R. H., Dilda, C. L., Chang, S., Fanara, J.-J., Kulkarni, N. H., Ganguly, I., Rollmann, S. M., Kamdar, K. P. and Mackay, T. F. C.** (2003). The genetic architecture of odor-guided behavior in *Drosophila*: epistasis and the transcriptome. *Nat. Genet.* **35**, 180-184. doi:10.1038/ng1240
- Arnsten, A. F. T., Wang, M. J. and Paspalas, C. D.** (2012). Neuromodulation of thought: flexibilities and vulnerabilities in prefrontal cortical network synapses. *Neuron* **76**, 223-239. doi:10.1016/j.neuron.2012.08.038
- Asahina, K.** (2017). Neuromodulation and strategic action choice in *Drosophila* aggression. *Annu. Rev. Neurosci.* **40**, 51-75. doi:10.1146/annurev-neuro-072116-031240
- Asahina, K., Watanabe, K., Duistermars, B. J., Hoopfer, E., González, C. R., Eyjólfsson, E. A., Perona, P. and Anderson, D. J.** (2014). Tachykinin-expressing neurons control male-specific aggressive arousal in *Drosophila*. *Cell* **156**, 221-235. doi:10.1016/j.cell.2013.11.045
- Baier, A., Wittek, B. and Brembs, B.** (2002). *Drosophila* as a new model organism for the neurobiology of aggression? *J. Exp. Biol.* **205**, 1233-1240.
- Baines, R. A., Uhler, J. P., Thompson, A., Sweeney, S. T. and Bate, M.** (2001). Altered electrical properties in *Drosophila* neurons developing without synaptic transmission. *J. Neurosci.* **21**, 1523-1531. doi:10.1523/JNEUROSCI.21-05-01523.2001
- Baldi, E. and Bucherelli, C.** (2005). The inverted 'U-shaped' dose-effect relationships in learning and memory: modulation of arousal and consolidation. *Nonlinearity Biol. Toxicol. Med.* **3**, 9-21. doi:10.2201/nonlin.003.01.002
- Barajas-Azpeleta, R., Wu, J., Gill, J., Welte, R., Seidel, C., McKinney, S., Dissel, S. and Si, K.** (2018). Antimicrobial peptides modulate long-term memory. *PLoS Genet.* **14**, e1007440. doi:10.1371/journal.pgen.1007440
- Belgacem, Y. H. and Martin, J. R.** (2002). Neuroendocrine control of a sexually dimorphic behavior by a few neurons of the pars intercerebralis in *Drosophila*. *Proc. Natl. Acad. Sci. USA* **99**, 15154-15158. doi:10.1073/pnas.232244199
- Billeter, J.-C. and Levine, J. D.** (2015). The role of cVA and the odorant binding protein Lush in social and sexual behavior in *Drosophila melanogaster*. *Front. Ecol. Evol.* **3**, 1-14. doi:10.3389/fevo.2015.00075
- Bloch, G. J., Babcock, A. M., Gorski, R. A. and Micevych, P. E.** (1987). Cholecystokinin stimulates and inhibits lordosis behavior in female rats. *Physiol. Behav.* **39**, 217-224. doi:10.1016/0031-9384(87)90012-6
- Bradwejn, J., Koszycki, D. and Bourin, M.** (1991). Dose ranging study of the effects of cholecystokinin in healthy volunteers. *J. Psychiatry Neurosci.* **16**, 91-95.
- Brunel, N. and Wang, X.-J.** (2001). Effects of neuromodulation in a cortical network model of object working. *J. Comput. Neurosci.* **11**, 63-85. doi:10.1023/A:1011204814320
- Burgdorf, J., Panksepp, J., Beinfeld, M. C., Kroes, R. A. and Moskal, J. R.** (2006). Regional brain cholecystokinin changes as a function of rough-and-tumble play behavior in adolescent rats. *Peptides* **27**, 172-177. doi:10.1016/j.peptides.2005.07.005
- Calabrese, E. J.** (2001). 5-Hydroxytryptamine (Serotonin): biphasic dose responses. *Crit. Rev. Toxicol.* **31**, 553-561. doi:10.1080/2001409111820
- Calabrese, E. J. and Baldwin, L. A.** (2001). Hormesis: U-shaped dose responses and their centrality in toxicology. *Trends Pharmacol. Sci.* **22**, 285-291. doi:10.1016/S0165-6147(00)01719-3
- Calabrese, E. J. and Baldwin, L. A.** (2003). HORMESIS: the dose-response revolution. *Annu. Rev. Pharmacol. Toxicol.* **43**, 175-197. doi:10.1146/annurev.pharmtox.43.100901.140223
- Carney, G. E.** (2007). A rapid genome-wide response to *Drosophila melanogaster* social interactions. *BMC Genomics* **8**, 2-11. doi:10.1186/1471-2164-8-288
- Certel, S. J., Savella, M. G., Schlegel, D. C. F. and Kravitz, E. A.** (2007). Modulation of *Drosophila* male behavioral choice. *Proc. Natl. Acad. Sci. USA* **104**, 4706-4711. doi:10.1073/pnas.0700328104
- Chen, X. and Ganetzky, B.** (2012). A neuropeptide signaling pathway regulates synaptic growth in *Drosophila*. *J. Cell Biol.* **196**, 529-543. doi:10.1083/jcb.201109044
- Chen, S., Lee, A. Y., Bowens, N. M., Huber, R. and Kravitz, E. A.** (2002). Fighting fruit flies: a model system for the study of aggression. *Proc. Natl. Acad. Sci. USA* **99**, 5664-5668. doi:10.1073/pnas.082102599
- Chen, X., Peterson, J., Nachman, R. J. and Ganetzky, B.** (2012). Drosulfakinin activates CCKLR-17D1 and promotes larval locomotion and escape response in *Drosophila*. *Fly (Austin)* **6**, 290-297. doi:10.4161/fly.21534
- Chen, X., Rahman, R., Guo, F. and Rosbash, M.** (2016). Genome-wide identification of neuronal activity-regulated genes in *Drosophila*. *Elife* **5**, e19942. doi:10.7554/eLife.19942
- Chiang, Y. N., Tan, K. J., Chung, H., Lavrynenko, O., Shevchenko, A. and Yew, J. Y.** (2016). Steroid hormone signaling is essential for pheromone production and oocyte survival. *PLoS Genet.* **12**, 1-25. doi:10.1371/journal.pgen.1006126
- Cole, S. W., Capitano, J. P., Chun, K., Arevalo, J. M. G., Ma, J. and Cacioppo, J. T.** (2015). Myeloid differentiation architecture of leukocyte transcriptome dynamics in perceived social isolation. *Proc. Natl. Acad. Sci. USA* **112**, 15142-15147. doi:10.1073/pnas.1514249112
- Cools, R. and D'Esposito, M.** (2011). Inverted-U shaped dopamine actions on human working memory and cognitive control. *Biol. Psychiatry* **69**, e113-e125. doi:10.1016/j.biopsych.2011.03.028
- Dankert, H., Wang, L., Hoopfer, E. D., Anderson, D. J. and Perona, P.** (2009). Automated monitoring and analysis of social behavior in *Drosophila*. *Nat. Methods* **6**, 297-303. doi:10.1038/nmeth.1310
- Davis, S. M., Thomas, A. L., Nomie, K. J., Huang, L. and Dierick, H. A.** (2014). Tailless and Atrophin control *Drosophila* aggression by regulating neuropeptide signalling in the pars intercerebralis. *Nat. Commun.* **5**, 3177. doi:10.1038/ncomms4177
- Dierick, H. A. and Greenspan, R. J.** (2006). Molecular analysis of flies selected for aggressive behavior. *Nat. Genet.* **38**, 1023-1031. doi:10.1038/ng1864
- Dierick, H. A. and Greenspan, R. J.** (2007). Serotonin and neuropeptide F have opposite modulatory effects on fly aggression. *Nat. Genet.* **39**, 678-682. doi:10.1038/ng2029
- Ding, X. Z. and Bayer, B. M.** (1993). Increases of CCK mRNA and peptide in different brain areas following acute and chronic administration of morphine. *Brain Res.* **625**, 139-144. doi:10.1016/0006-8993(93)90146-E
- Dobin, A., Davis, C. A., Schlesinger, F., Drenkow, J., Zaleski, C., Jha, S., Batut, P., Chaisson, M. and Gingeras, T. R.** (2013). STAR: ultrafast universal RNA-seq aligner. *Bioinformatics* **29**, 15-21. doi:10.1093/bioinformatics/bts635
- Donelson, N., Kim, E. Z., Slawson, J. B., Vecsey, C. G., Huber, R. and Griffith, L. C.** (2012). High-resolution positional tracking for long-term analysis of *Drosophila* sleep and locomotion using the 'tracker' program. *PLoS ONE* **7**, e37250. doi:10.1371/journal.pone.0037250
- Dow, M. A. and von Schilcher, F.** (1975). Aggression and mating success in *Drosophila melanogaster*. *Nature* **254**, 511-512. doi:10.1038/254511a0
- Edwards, A. C., Rollmann, S. M., Morgan, T. J. and Mackay, T. F. C.** (2006). Quantitative genomics of aggressive behavior in *Drosophila melanogaster*. *PLoS Genet.* **2**, e154. doi:10.1371/journal.pgen.0020154
- Ellen, K., Tuchscherer, M., Puppe, B., Tuchscherer, A. and Stabenow, B.** (2004). Consequences of repeated early isolation in domestic piglets (*Sus scrofa*) on their behavioural, neuroendocrine, and immunological responses. *Brain Behav. Immun.* **18**, 35-45. doi:10.1016/S0889-1591(03)00085-0
- Ellis, L. L. and Carney, G. E.** (2011). Socially-responsive gene expression in male *Drosophila melanogaster* is influenced by the sex of the interacting partner. *Genetics* **187**, 157-169. doi:10.1534/genetics.110.122754
- Etheredge, J., Baumann, A. and Truman, J. W.** (2018). Fluorescent reporter combination optimization for flow cytometry purity of labeled *Drosophila* neurons. <https://doi.org/10.6084/m9.figshare.6934250.v1>
- Ferguson, C. J., Averill, P. M., Rhoades, H., Rocha, D., Gruber, N. P. and Gummattira, P.** (2005). Social isolation, impulsivity and depression as predictors of aggression in a psychiatric inpatient population. *Psychiatr. Q.* **76**, 123-137. doi:10.1007/s11089-005-2335-1
- Flood, J. F., Hernandez, E. N. and Morley, J. E.** (1987). Modulation of memory processing by neuropeptide Y. *Brain Res.* **421**, 280-290. doi:10.1016/0006-8993(87)91297-2
- Fujii, S. and Amrein, H.** (2002). Genes expressed in the *Drosophila* head reveal a role for fat cells in sex-specific physiology. *EMBO J.* **21**, 5353-5363. doi:10.1093/emboj/cdf556
- Fulwiler, C. E. and Saper, C. B.** (1985). Cholecystokinin-immunoreactive innervation of the ventromedial hypothalamus in the rat: possible substrate for autonomic regulation of feeding. *Neurosci. Lett.* **53**, 289-296. doi:10.1016/0304-3940(85)90553-1
- Galindo, K. and Smith, D. P.** (2001). A large family of divergent *Drosophila* odorant-binding proteins expressed in gustatory and olfactory sensilla. *Genetics* **159**, 1059-1072.
- Ganguly-Fitzgerald, I., Donlea, J. and Shaw, P. J.** (2006). Waking experience affects sleep need in *Drosophila*. *Science* **313**, 1775-1781. doi:10.1126/science.1130408

- Gregg, T. R. and Siegel, A. (2001). Brain structures and neurotransmitters regulating aggression in cats: Implications for human aggression. *Prog. Neuropsychopharmacol. Biol. Psychiatry* **25**, 91-140. doi:10.1016/S0278-5846(00)00150-0
- Grippo, A. J., Cushing, B. S. and Carter, C. S. (2007). Depression-like behavior and stressor-induced neuroendocrine activation in female prairie voles exposed to chronic social isolation. *Psychosom. Med.* **69**, 149-157. doi:10.1097/PSY.0b013e31802f054b
- Hall, F. S., Wilkinson, L. S., Humby, T., Inglis, W., Kendall, D. A., Marsden, C. A. and Robbins, T. W. (1998). Isolation rearing in rats: pre- and postsynaptic changes in striatal dopaminergic systems. *Pharmacol. Biochem. Behav.* **59**, 859-872. doi:10.1016/S0091-3057(97)00510-8
- Haller, J. (2013). The neurobiology of abnormal manifestations of aggression: a review of hypothalamic mechanisms in cats, rodents, and humans. *Brain Res. Bull.* **93**, 97-109. doi:10.1016/j.brainresbull.2012.10.003
- Hartenstein, V. (2006). The neuroendocrine system of invertebrates: a developmental and evolutionary perspective. *J. Endocrinol.* **190**, 555-570. doi:10.1677/joe.1.06964
- Herman, J. P. (2013). Neural control of chronic stress adaptation. *Front. Behav. Neurosci.* **7**, 1-12. doi:10.3389/fnbeh.2013.00061
- Hoffmann, A. A. (1987). A laboratory study of male territoriality in the sibling species *Drosophila melanogaster* and *D. simulans*. *Anim. Behav.* **35**, 807-818. doi:10.1016/S0003-3472(87)80117-3
- Hoffmann, A. A. (1989). The influence of age and experience with conspecifics on territorial behavior in *Drosophila melanogaster*. *J. Insect Behav.* **3**, 1-12. doi:10.1007/BF01049191
- Hooper, E. D. (2016). Neural control of aggression in *Drosophila*. *Curr. Opin. Neurobiol.* **38**, 109-118. doi:10.1016/j.conb.2016.04.007
- Hoyer, S. C., Eckart, A., Herrel, A., Zars, T., Fischer, S. A., Hardie, S. L. and Heisenberg, M. (2008). Octopamine in male aggression of *Drosophila*. *Curr. Biol.* **18**, 159-167. doi:10.1016/j.cub.2007.12.052
- Immonen, E. and Ritchie, M. G. (2012). The genomic response to courtship song stimulation in female *Drosophila melanogaster*. *Proc. R. Soc. B* **279**, 1359-1365. doi:10.1098/rspb.2011.1644
- Jacobs, M. E. (1960). Influence of light on mating of *Drosophila melanogaster*. *Ecology* **41**, 182-188. doi:10.2307/1931952
- Joëls, M. (2006). Corticosteroid effects in the brain: U-shape it. *Trends Pharmacol. Sci.* **27**, 244-250. doi:10.1016/j.tips.2006.03.007
- Katsouni, E., Zarros, A., Skandali, N., Tsakiris, S. and Lappas, D. (2013). The role of cholecystokinin in the induction of aggressive behavior: a focus on the available experimental data (review). *Acta Physiol. Hung.* **100**, 361-377. doi:10.1556/APhysiol.100.2013.4.1
- Kayser, M. S., Mainwaring, B., Yue, Z. and Sehgal, A. (2015). Sleep deprivation suppresses aggression in *Drosophila*. *Elife* **4**, 1-15. doi:10.7554/eLife.07643
- Kim, Y.-K., Saver, M., Simon, J., Kent, C. F., Shao, L., Eddison, M., Agrawal, P., Texada, M., Truman, J. W. and Heberlein, U. (2018). Repetitive aggressive encounters generate a long-lasting internal state in *Drosophila melanogaster* males. *Proc. Natl. Acad. Sci. USA* **115**, 1099-1104. doi:10.1073/pnas.1716612115
- Koganezawa, M., Kimura, K. and Yamamoto, D. (2016). The neural circuitry that functions as a switch for courtship versus aggression in *Drosophila* males. *Curr. Biol.* **26**, 1395-1403. doi:10.1016/j.cub.2016.04.017
- Kohn, M. C. and Melnick, R. L. (2002). Biochemical origins of the non-monotonic receptor-mediated dose-response. *J. Mol. Endocrinol.* **29**, 113-123. doi:10.1677/jme.0.0290113
- Köks, S., Soosaar, A., Vöikar, V., Bourin, M. and Vasar, E. (1999). BOC-CCK-4, CCK(B) receptor agonist, antagonizes anxiolytic-like action of morphine in elevated plus-maze. *Neuropeptides* **33**, 63-69. doi:10.1054/npep.1999.0015
- Kravitz, E. A. and Fernandez, M. P. (2015). Aggression in *Drosophila*. *Behav. Neurosci.* **129**, 549-563. doi:10.1037/bne0000089
- Kravitz, E. A. and Huber, R. (2003). Aggression in invertebrates. *Curr. Opin. Neurobiol.* **13**, 736-743. doi:10.1016/j.conb.2003.10.003
- Kruk, M. R., Van der Laan, C. E., Mos, J., Van der Poel, A. M., Meelis, W. and Olivier, B. (1984). Comparison of aggressive behaviour induced by electrical stimulation in the hypothalamus of male and female rats. *Prog. Brain Res.* **61**, 303-314. doi:10.1016/S0079-6123(08)64443-X
- Kubiak, T. M., Larsen, M. J., Burton, K. J., Bannow, C. A., Martin, R. A., Zantello, M. R. and Lowery, D. E. (2002). Cloning and functional expression of the first *Drosophila melanogaster* sulfakinin receptor DSK-R1. *Biochem. Biophys. Res. Commun.* **291**, 313-320. doi:10.1006/bbrc.2002.6459
- Kulkosky, P. J., Breckenridge, C., Krinsky, R. and Woods, S. C. (1976). Satiety elicited by the C-terminal octapeptide of cholecystokinin-pancreozymin in normal and VMH-lesioned rats. *Behav. Biol.* **18**, 227-234. doi:10.1016/S0091-6773(76)92134-9
- Larter, N. K., Sun, J. S. and Carlson, J. R. (2016). Organization and function of *Drosophila* odorant binding proteins. *Elife* **5**, e20242. doi:10.7554/eLife.20242
- Laughlin, J. D., Ha, T. S., Jones, D. N. M. and Smith, D. P. (2008). Activation of pheromone-sensitive neurons is mediated by conformational activation of pheromone-binding protein. *Cell* **133**, 1255-1265. doi:10.1016/j.cell.2008.04.046
- Leng, N., Dawson, J. A., Thomson, J. A., Ruotti, V., Rissman, A. I., Smits, B. M. G., Haag, J. D., Gould, M. N., Stewart, R. M. and Kendzioriski, C. (2013). EBSeq: an empirical Bayes hierarchical model for inference in RNA-seq experiments. *Bioinformatics* **29**, 1035-1043. doi:10.1093/bioinformatics/btt087
- Li, Q., Deng, X. and Singh, P. (2007). Significant increase in the aggressive behavior of transgenic mice overexpressing peripheral progastrin peptides: associated changes in CCK2 and serotonin receptors in the CNS. *Neuropsychopharmacology* **32**, 1813-1821. doi:10.1038/sj.npp.1301304
- Lin, D., Boyle, M. P., Dollar, P., Lee, H., Lein, E. S., Perona, P. and Anderson, D. J. (2011). Functional identification of an aggression locus in the mouse hypothalamus. *Nature* **470**, 221-226. doi:10.1038/nature09736
- Lipp, H. P. and Hunsperger, R. W. (1978). Threat, attack and flight elicited by electrical stimulation of the ventromedial hypothalamus of the marmoset monkey *Callithrix jacchus*. *Brain. Behav. Evol.* **15**, 260-275. doi:10.1159/000123782
- Liu, W., Liang, X., Gong, J., Yang, Z., Zhang, Y.-H., Zhang, J.-X. and Rao, Y. (2011). Social regulation of aggression by pheromonal activation of Or65a olfactory neurons in *Drosophila*. *Nat. Neurosci.* **14**, 896-902. doi:10.1038/nn.2836
- Love, M. I., Huber, W. and Anders, S. (2014). Moderated estimation of fold change and dispersion for RNA-seq data with DESeq2. *Genome Biol.* **15**, 1-21. doi:10.1186/gb-2014-15-1-r1
- Luciano, D. and Lore, R. (1975). Aggression and social experience in domesticated rats. *J. Comp. Physiol. Psychol.* **88**, 917-923. doi:10.1037/h0076439
- Luo, J., Lushchak, O. V., Goergen, P., Williams, M. J. and Nässel, D. R. (2014). *Drosophila* insulin-producing cells are differentially modulated by serotonin and octopamine receptors and affect social behavior. *PLoS ONE* **9**, e99732. doi:10.1371/journal.pone.0099732
- Ma, X.-c., Jiang, D., Jiang, W.-h., Wang, F., Jia, M., Wu, J., Hashimoto, K., Dang, Y.-h. and Gao, C.-g. (2011). Social isolation-induced aggression potentiates anxiety and depressive-like behavior in male mice subjected to unpredictable chronic mild stress. *PLoS ONE* **6**, e20955. doi:10.1371/journal.pone.0020955
- Mattaliano, M. D., Montano, E. S., Parisky, K. M., Littleton, J. T. and Griffith, L. C. (2007). The *Drosophila* ARC homolog regulates behavioral responses to starvation. *Mol. Cell. Neurosci.* **36**, 211-221. doi:10.1016/j.mcn.2007.06.008
- Mohorianu, I., Bretman, A., Smith, D. T., Fowler, E. K., Dalmay, T. and Chapman, T. (2017). Genomic responses to the socio-sexual environment in male *Drosophila melanogaster* exposed to conspecific rivals. *RNA* **23**, 1048-1059. doi:10.1261/ma.059246.116
- Monte-Silva, K., Kuo, M.-F., Thirugnanasambandam, N., Liebetanz, D., Paulus, W. and Nitsche, M. A. (2009). Dose-dependent inverted U-shaped effect of dopamine (D2-Like) receptor activation on focal and nonfocal plasticity in humans. *J. Neurosci.* **29**, 6124-6131. doi:10.1523/JNEUROSCI.0728-09.2009
- Nagarkar-Jaiswal, S., Lee, P. T., Campbell, M. E., Chen, K., Anguiano-Zarate, S., Gutierrez, M. C., Busby, T., Lin, W. W., He, Y., Schulze, K. L. et al. (2015). A library of MiMICs allows tagging of genes and reversible, spatial and temporal knockdown of proteins in *Drosophila*. *Elife* **4**, e05338. doi:10.7554/eLife.05338.023
- Nichols, R. (1992). Isolation and expression of the *Drosophila* drosulfakinin neural peptide gene product, DSK-I. *Mol. Cell. Neurosci.* **3**, 342-347. doi:10.1016/1044-7431(92)90031-V
- Nichols, R., Lim, I. A. (1996). Spatial and temporal immunocytochemical analysis of drosulfakinin (Dsk) gene products in the *Drosophila melanogaster* central nervous system. *Cell Tissue Res.* **283**, 107-116. doi:10.1007/s004410050518
- Nichols, R., Schneuwly, S. A. and Dixon, J. E. (1988). Identification and characterization of a *Drosophila* homologue to the vertebrate neuropeptide cholecystokinin. *J. Biol. Chem.* **263**, 12167-12170.
- Nilsen, S. P., Chan, Y.-B., Huber, R. and Kravitz, E. A. (2004). Gender-selective patterns of aggressive behavior in *Drosophila melanogaster*. *Proc. Natl. Acad. Sci. USA* **101**, 12342-12347. doi:10.1073/pnas.0404693101
- Nitabach, M. N. (2006). Electrical hyperexcitation of lateral ventral pacemaker neurons desynchronizes downstream circadian oscillators in the fly circadian circuit and induces multiple behavioral periods. *J. Neurosci.* **26**, 479-489. doi:10.1523/JNEUROSCI.3915-05.2006
- Panksepp, J., Burgdorf, J., Beinfeld, M. C., Kroes, R. A. and Moskal, J. R. (2004). Regional brain cholecystokinin changes as a function of friendly and aggressive social interactions in rats. *Brain Res.* **1025**, 75-84. doi:10.1016/j.brainres.2004.07.076
- Perkins, L. A., Holderbaum, L., Tao, R., Hu, Y., Sopko, R., McCall, K., Yang-Zhou, D., Flockhart, I., Binari, R., Shim, H.-S. et al. (2015). The transgenic RNAi project at Harvard medical school: resources and validation. *Genetics* **201**, 843-852. doi:10.1534/genetics.115.180208
- Pfeiffer, B. D., Truman, J. W. and Rubin, G. M. (2012). Using translational enhancers to increase transgene expression in *Drosophila*. *Proc. Natl. Acad. Sci. USA* **109**, 6626-6631. doi:10.1073/pnas.1204520109
- Powell, N. D., Sloan, E. K., Bailey, M. T., Arevalo, J. M. G., Miller, G. E., Chen, E., Kober, M. S., Reader, B. F., Sheridan, J. F. and Cole, S. W. (2013). Social stress up-regulates inflammatory gene expression in the leukocyte transcriptome via  $\alpha$ -adrenergic induction of myelopoiesis. *Proc. Natl. Acad. Sci. USA* **110**, 16574-16579. doi:10.1073/pnas.1310655110

- Qi, Y., Fu, M. and Herzog, H. (2016). Y2 receptor signalling in NPY neurons controls bone formation and fasting induced feeding but not spontaneous feeding. *Neuropeptides* **55**, 91-97. doi:10.1016/j.npep.2015.09.009
- Ravi, P., Trivedi, D. and Hasan, G. S. (2018). FMRFa receptor stimulated  $Ca^{2+}$  signals alter the activity of flight modulating central dopaminergic neurons in *Drosophila melanogaster*. *PLoS Genet.* **14**, 1-25. doi:10.1371/journal.pgen.1007459
- Robinson, M. D., McCarthy, D. J. and Smyth, G. K. (2010). edgeR: a Bioconductor package for differential expression analysis of digital gene expression data. *Bioinformatics* **26**, 139-140. doi:10.1093/bioinformatics/btp616
- Rulifson, E. J. (2002). Ablation of insulin-producing neurons in flies: growth and diabetic phenotypes. *Science* **296**, 1118-1120. doi:10.1126/science.1070058
- Shao, L., Saver, M., Chung, P., Ren, Q., Lee, T. and Kent, C. F. (2017). Dissection of the *Drosophila* neuropeptide F circuit using a high-throughput two-choice assay. *Proc. Natl. Acad. Sci. USA* **114**, E8091-E8099. doi:10.1073/pnas.1710552114
- Söderberg, J. A. E., Carlsson, M. A. and Nässel, D. R. (2012). Insulin-producing cells in the *Drosophila* brain also express satiety-inducing cholecystokinin-like peptide, drosulfakinin. *Front. Endocrinol.* **3**, 1-13. doi:10.3389/fendo.2012.00109
- Tauber, M. (2010). Molecular genetics of aggressive behaviour in *Drosophila melanogaster*. *PhD thesis*, University of Leicester, UK.
- Terhzaz, S., Rosay, P., Goodwin, S. F. and Veenstra, J. A. (2007). The neuropeptide SIFamide modulates sexual behavior in *Drosophila*. *Biochem. Biophys. Res. Commun.* **352**, 305-310. doi:10.1016/j.bbrc.2006.11.030
- Thomas, A. L., Davis, S. M. and Dierick, H. A. (2015). Of fighting flies, mice, and men: are some of the molecular and neuronal mechanisms of aggression universal in the animal kingdom? *PLoS Genet.* **11**, e1005416. doi:10.1371/journal.pgen.1005416
- Töru, I., Aluoja, A., Vöhma, Ü., Raag, M., Vasar, V., Maron, E. and Shlik, J. (2010). Associations between personality traits and CCK-4-induced panic attacks in healthy volunteers. *Psychiatry Res.* **178**, 342-347. doi:10.1016/j.psychres.2010.04.003
- Toth, M., Fuzesi, T., Halasz, J., Tulogdi, A. and Haller, J. (2010). Neural inputs of the hypothalamic 'aggression area' in the rat. *Behav. Brain Res.* **215**, 7-20. doi:10.1016/j.bbr.2010.05.050
- Vaccarino, F. J. (1994). Nucleus accumbens dopamine-CCK interactions in psychostimulant reward and related behaviors. *Neurosci. Biobehav. Rev.* **18**, 207-214. doi:10.1016/0149-7634(94)90025-6
- Vasar, E., Peuranen, E., Harro, J., Lang, A. and Oreland, L. (1993). Social isolation of rats increases the density of cholecystokinin receptors in the frontal cortex and abolishes the anti-exploratory effect of caerulein. *Arch. Pharmacol.* **348**, 96-101. doi:10.1007/BF00168543
- Wallace, D. L., Han, M.-H., Graham, D. L., Green, T. A., Vialou, V., Iñiguez, S. D., Cao, J.-L., Kirk, A., Chakravarty, S., Kumar, A. et al. (2009). CREB regulation of nucleus accumbens excitability mediates social isolation-induced behavioral deficits. *Nat. Neurosci.* **12**, 200-209. doi:10.1038/nn.2257
- Wang, L. and Anderson, D. J. (2010). Identification of an aggression-promoting pheromone and its receptor neurons in *Drosophila*. *Nature* **463**, 227-231. doi:10.1038/nature08678
- Wang, L., Dankert, H., Perona, P. and Anderson, D. J. (2008). A common genetic target for environmental and heritable influences on aggressiveness in *Drosophila*. *Proc. Natl. Acad. Sci. USA* **105**, 5657-5663. doi:10.1073/pnas.0801327105
- Wen, T., Parrish, C. A., Xu, D., Wu, Q. and Shen, P. (2005). *Drosophila* neuropeptide F and its receptor, NPFR1, define a signaling pathway that acutely modulates alcohol sensitivity. *Proc. Natl. Acad. Sci. USA* **102**, 2141-2146. doi:10.1073/pnas.0406814102
- Williams, M. J., Goergen, P., Rajendran, J., Klockars, A., Kasagiannis, A., Fredriksson, R. and Schiöth, H. B. (2014). Regulation of aggression by obesity-linked genes TfAP-2 and Twz through octopamine signaling in *Drosophila*. *Genetics* **196**, 349-362. doi:10.1534/genetics.113.158402
- Wolfner, M. F. (2003). Sex determination: sex on the brain? *Curr. Biol.* **13**, 103-105. doi:10.1016/S0960-9822(03)00038-1
- Wu, S., Guo, C., Zhao, H., Sun, M., Chen, J., Han, C., Peng, Q., Qiao, H., Peng, P., Liu, Y. et al. (2019). Drosulfakinin signaling in fruitless circuitry antagonizes P1 neurons to regulate sexual arousal in *Drosophila*. *Nat. Commun.* **10**, 4770. doi:10.1038/s41467-019-12758-6
- Zhou, C., Rao, Y. and Rao, Y. (2008). A subset of octopaminergic neurons are important for *Drosophila* aggression. *Nat. Neurosci.* **11**, 1059-1067. doi:10.1038/nn.2164
- Zwanzger, P., Domschke, K. and Bradwejn, J. (2012). Neuronal network of panic disorder: the role of the neuropeptide cholecystokinin. *Depress. Anxiety* **29**, 762-774. doi:10.1002/da.21919
